# Supplementary material for: Identification and validation of single-sample breast cancer radiosensitivity gene expression predictors
Source: PubMed Central journal article supplement (PMC6033283; doi:10.1186/s13058-018-0978-y), 2018-07-04
Supplement: 13058_2018_978_MOESM6_ESM.pdf [file 13058_2018_978_MOESM6_ESM.pdf]

# Hierarchical clustering of the genes included from the discovery analysis

Supplemental figure 2

■ Case

ER+RT-

ER+RT+

ER-RT-

ER-RT+

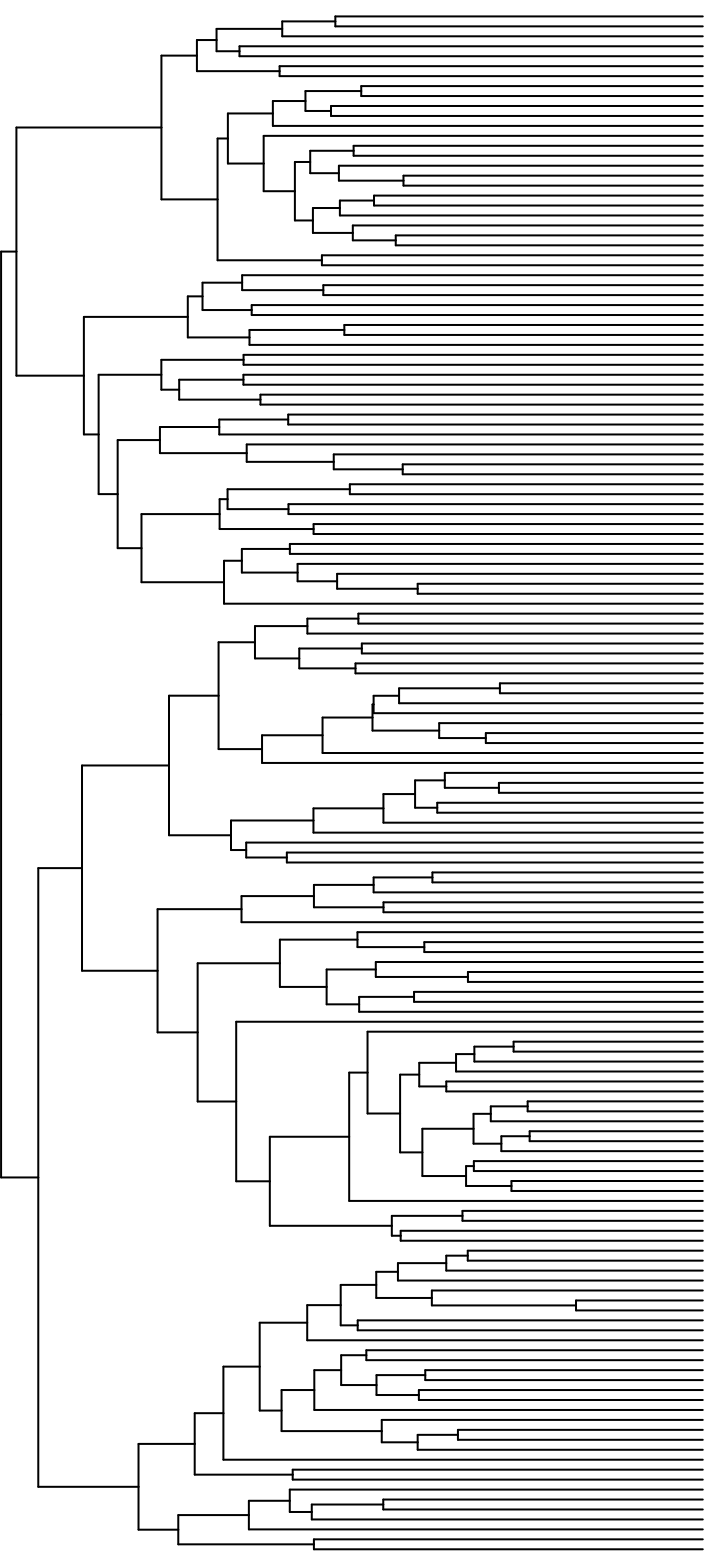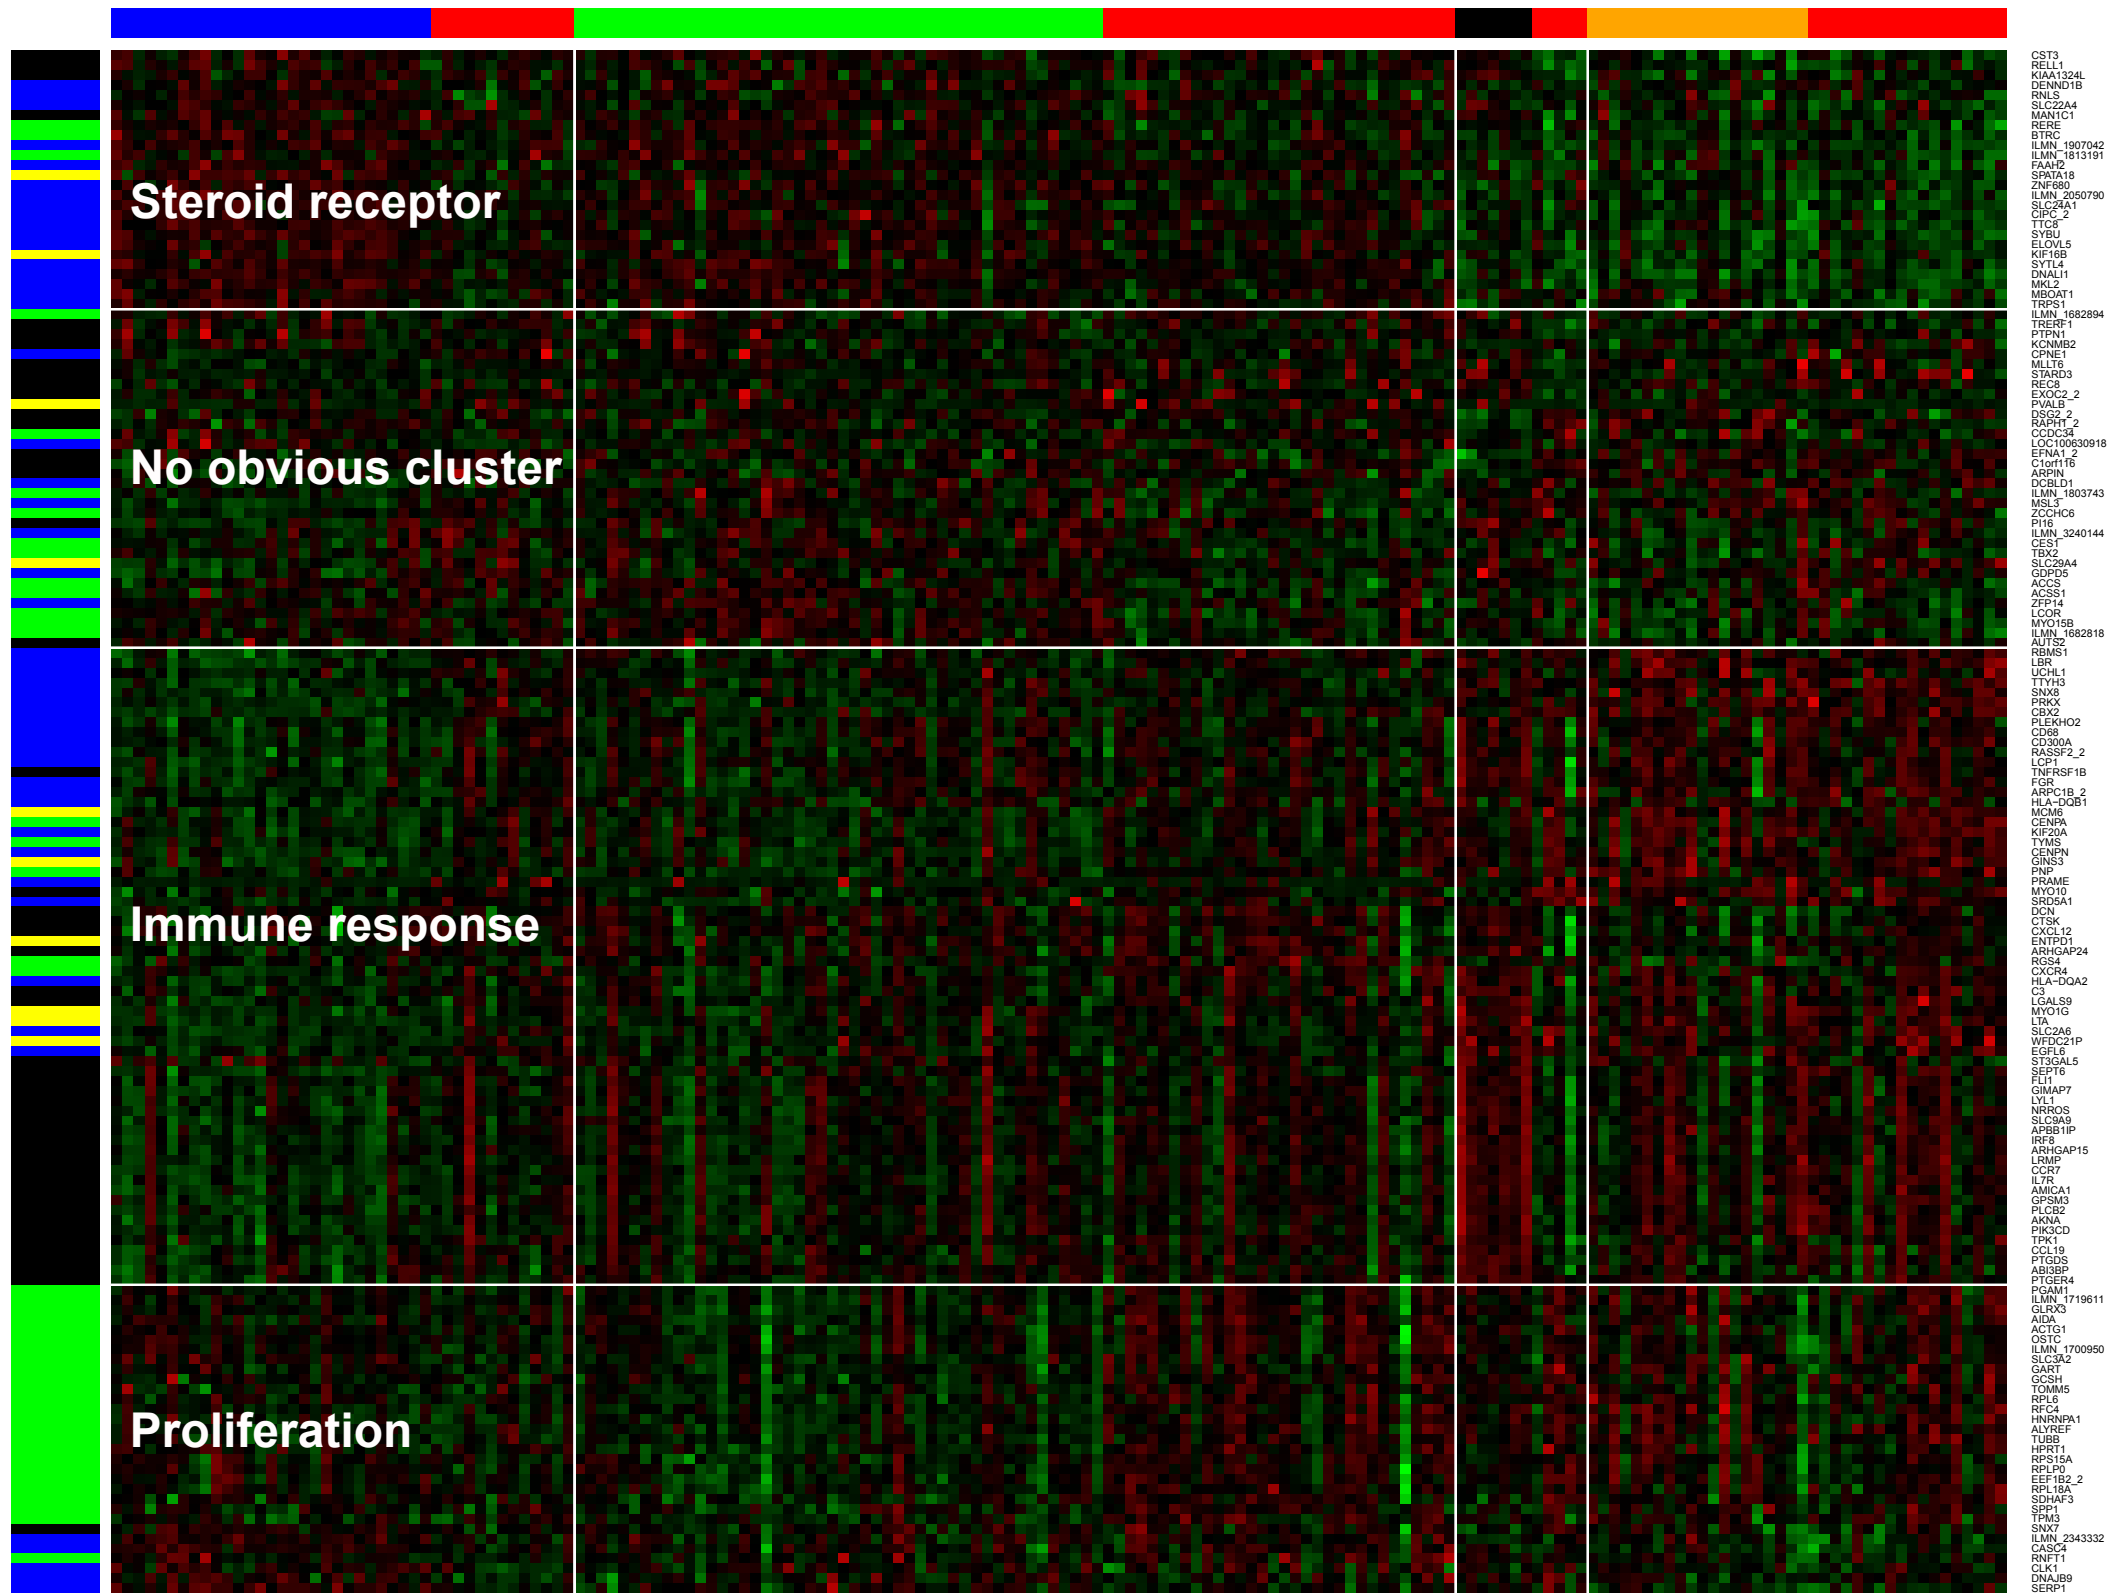

CST3  
RELL1  
KJAA1324L  
RND1B  
RNLS  
SLC22A4  
MANTIC1  
RERE  
BTRC  
ILMN\_1907042  
ILMN\_1813191  
FAA2  
SPATA18  
ZNF980  
ILMN\_2050790  
SLC24A1  
GIPC2  
TTC8  
SYB1  
ELOVL5  
KIF16B  
STTL4  
DNALI1  
MKL2  
MBOAT1  
TRPS1  
ILMN\_1682894  
TREF  
PTPN1  
KCNMB2  
CPNE1  
MLLT6  
STARD3  
REC8  
EXOC2\_2  
RYALB  
DSG2\_2  
RAB17\_2  
CDDC34  
LOC10030918  
EFNA1  
C10orf16  
ARPP19  
DCBLD1  
ILMN\_1803743  
NSL1  
ZCCHC6  
P16  
ILMN\_3240144  
CEST1  
TKA2  
SLC29A4  
GDPD5  
ACCS  
ACSS1  
ZFP14  
LCOB  
MYO15B  
ILMN\_1682818  
LUTS2  
RBM51  
BR  
UCHL1  
TTYH3  
SNX8  
PRKX  
CBX2  
PLEKH02  
CD88  
CD300A  
RASSF2\_2  
LPT  
TNFRSF1B  
FGR  
ARPC1B\_2  
HLA-DOB1  
MCM6  
CENPA  
KIF20A  
TYMS  
CENPN  
GINS3  
PNP  
PRAME  
MYO10  
SRGA1  
DCN  
TSSK  
CXCL12  
ENTPD1  
ARHGAP24  
RGS4  
CXCR4  
HLA-DQA2  
C3  
LGALS9  
MYO1G  
LTA  
SLC22A6  
WFDC21P  
EGFL6  
ST3GAL5  
SEPT6  
RLH  
GIMAP7  
LYL1  
NRROS  
SLC9A9  
APBB1IP  
IPR8  
ARHGAP15  
LRMP  
CCR7  
IL7R  
AMICA1  
GPSM3  
FLCB2  
AKNA  
PIK3CD  
TRK1  
CCL19  
PTGDS  
ABISBP  
PTGER4  
FGAM1  
ILMN\_1719611  
GLRX3  
AIDA  
ACTG1  
OSTC  
ILMN\_1700950  
GART  
SLC3A2  
GASH  
GCSH  
TOMM5  
RPL6  
RFC4  
HNRNPA1  
ALYREF  
TUBB  
HPS11  
RPS16A  
RPLP0  
EF1B2\_2  
RPL18A  
SDHAF3  
TPM3  
SNX7  
ILMN\_2343332  
CASC4  
RNF11  
CLK1  
DNAJB9  
SERP1

Genes selcted from group:

■ ER+RT+ ■ ER+RT- ■ ER-RT- ■ ER+RT- combined with ER+RT+ controls
