# Supplementary material for: Identification and validation of single-sample breast cancer radiosensitivity gene expression predictors
Source: PubMed Central journal article supplement (PMC6033283; doi:10.1186/s13058-018-0978-y), 2018-07-04

Correlation of SSP scores with proliferation and immune response

ER+RT+

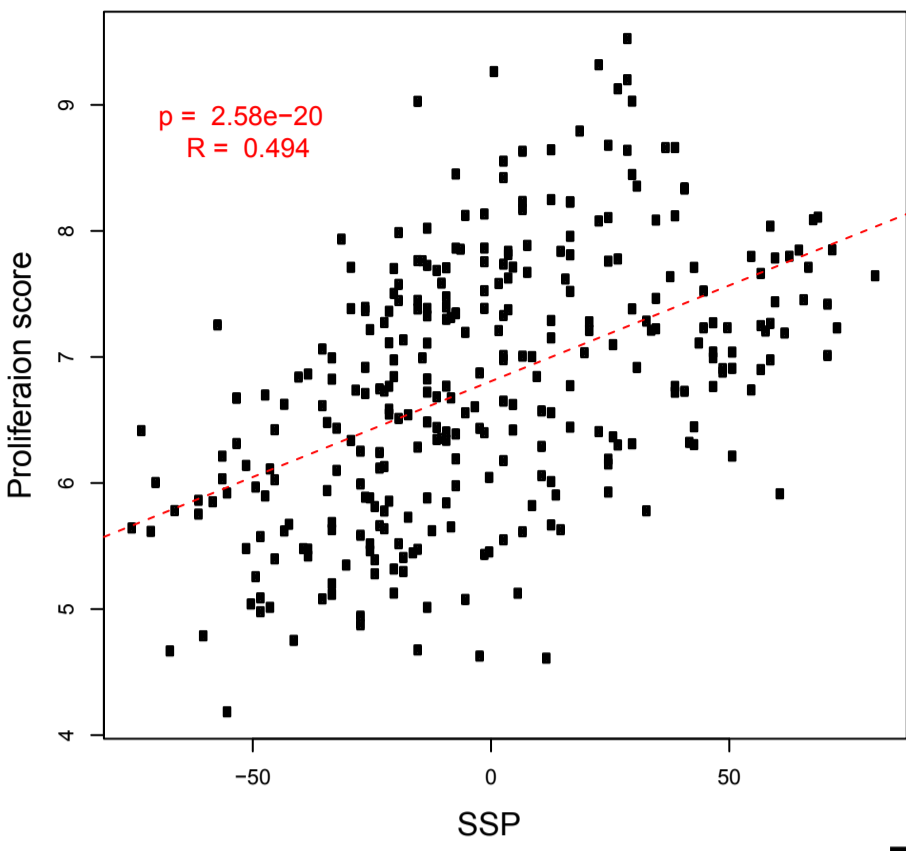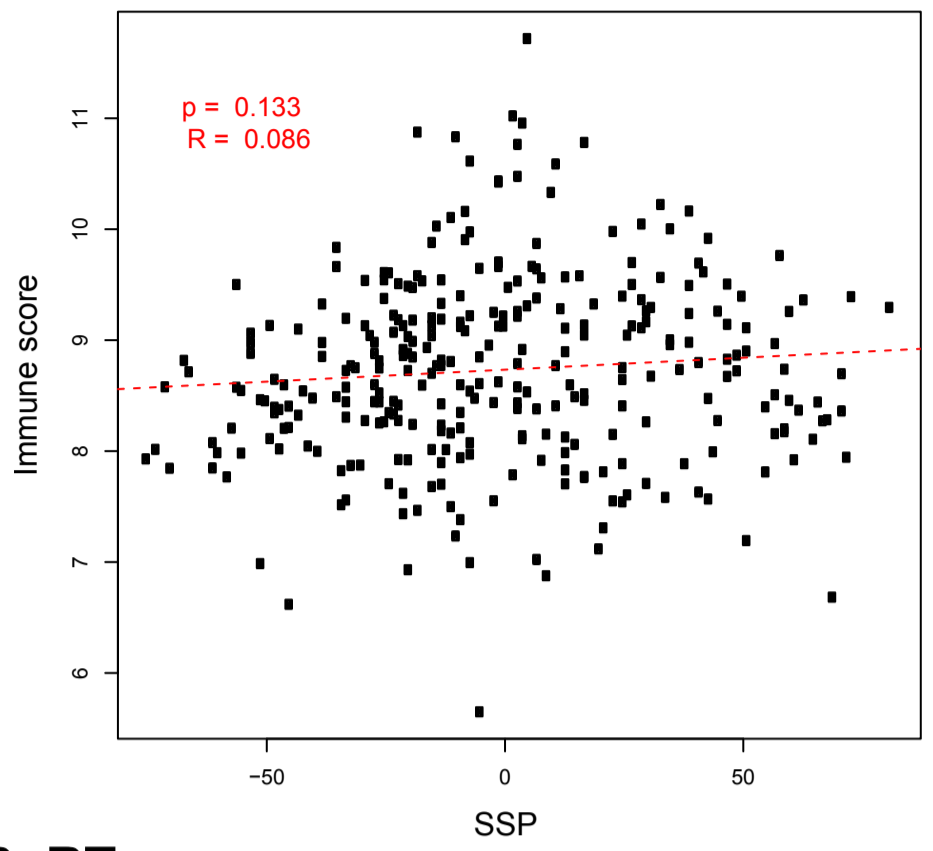

ER+RT-

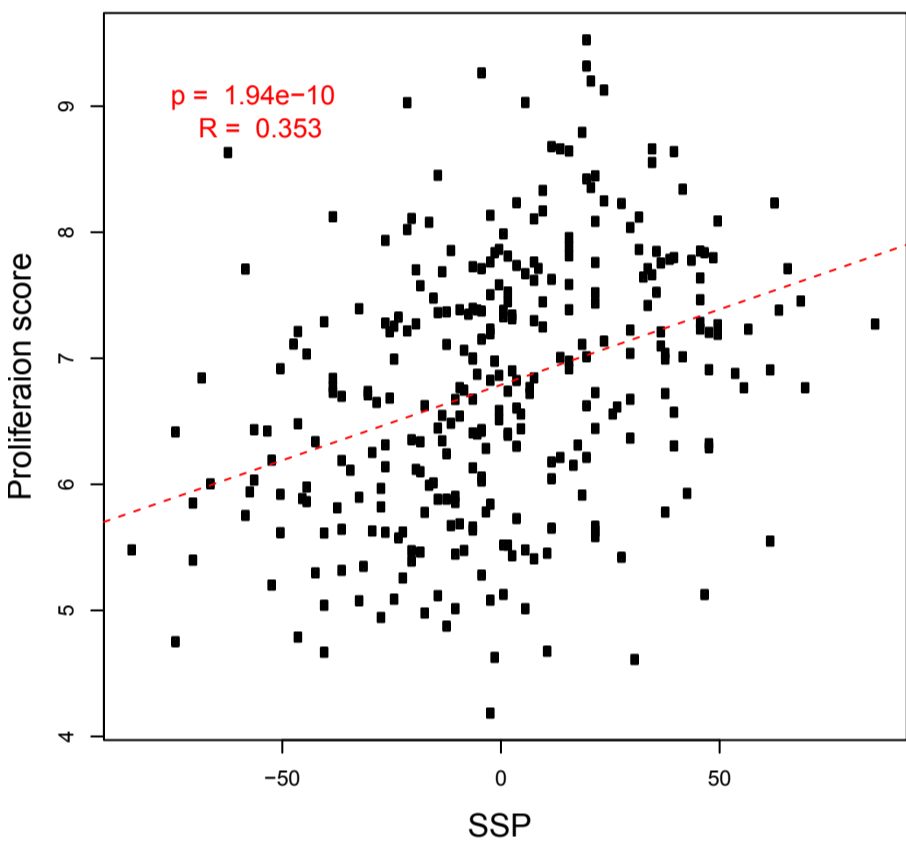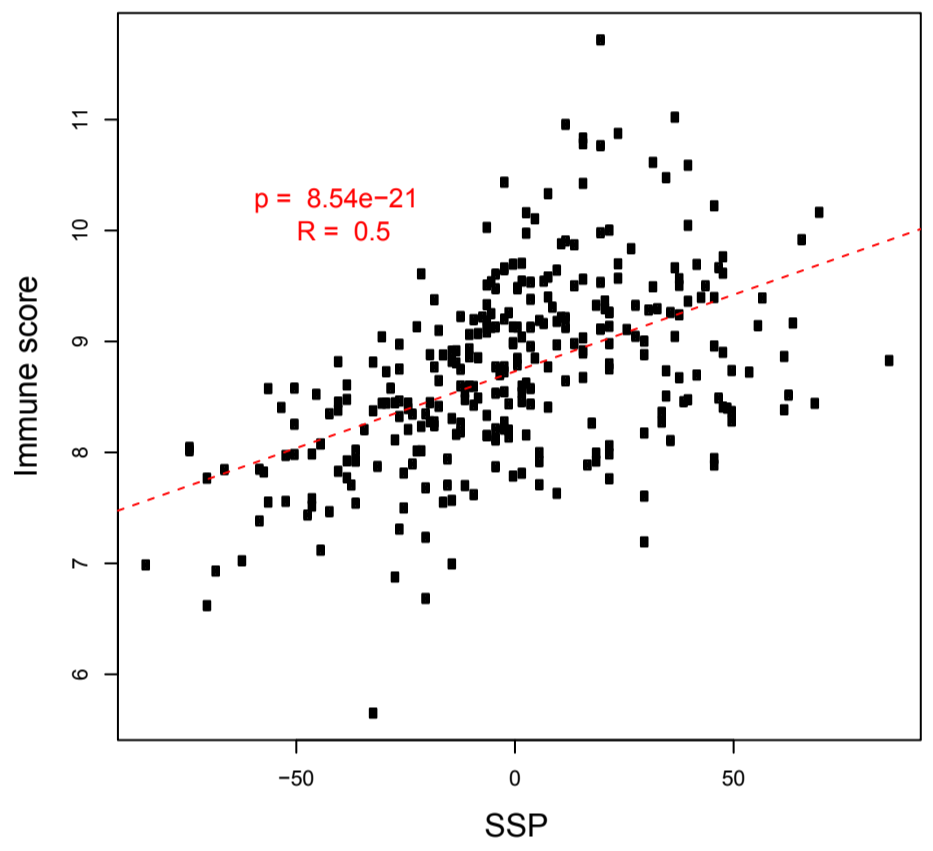

ER-RT+

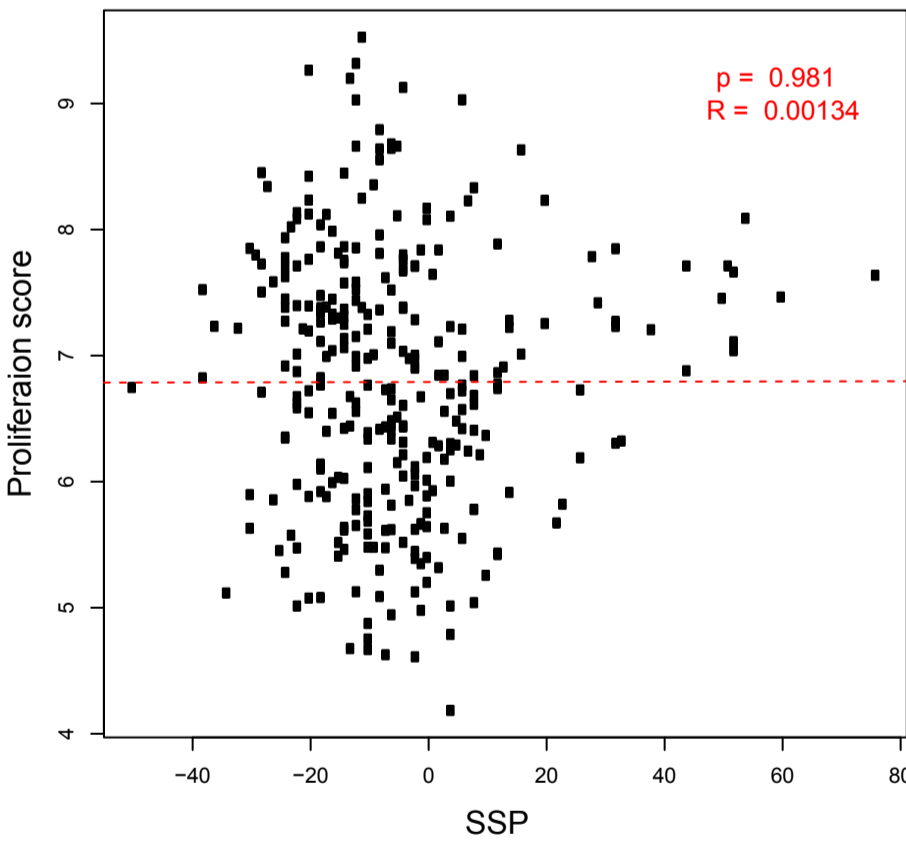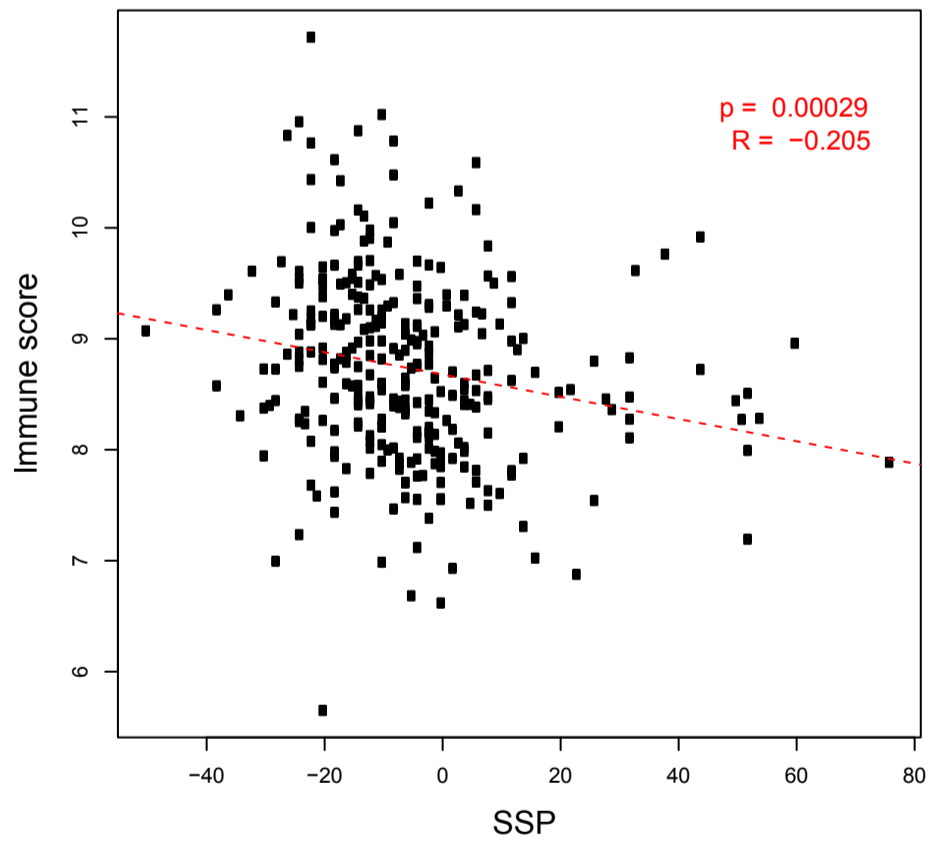

ER-RT-

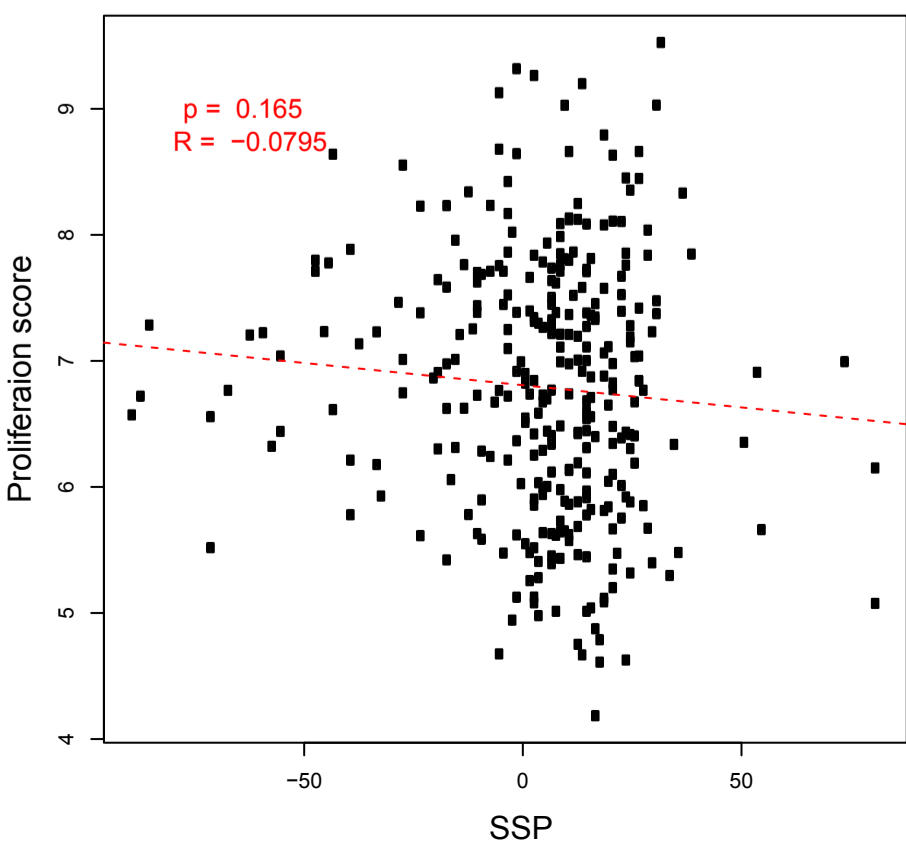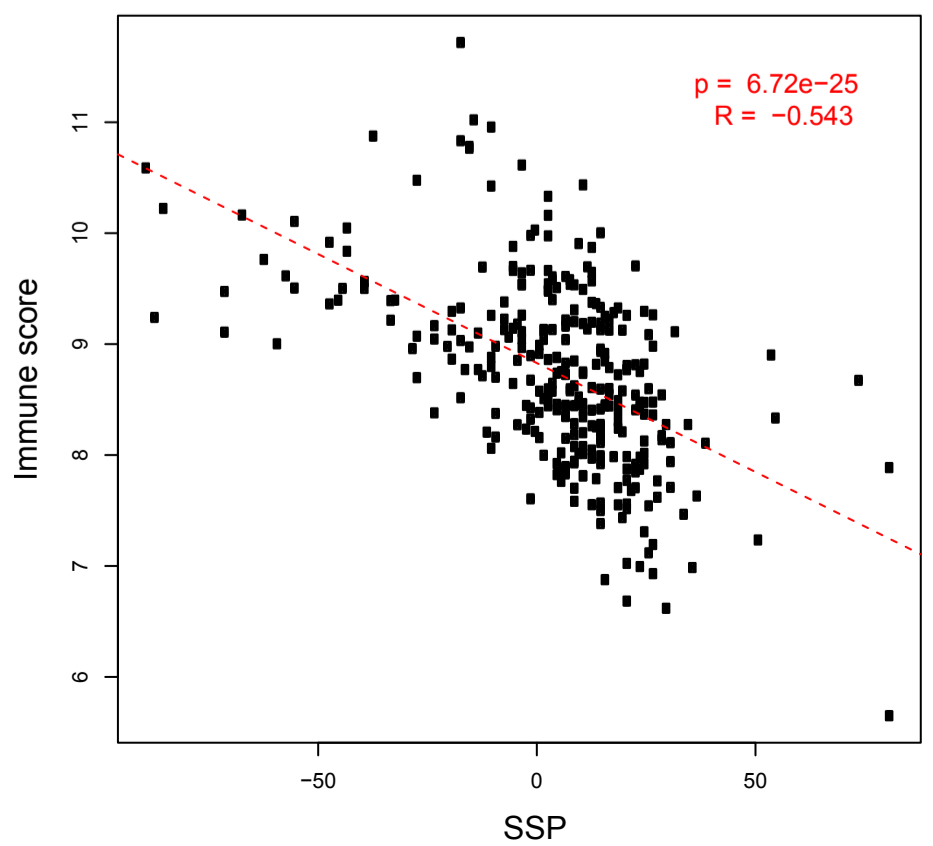

Supplement: 13058_2018_978_MOESM8_ESM.pdf [file 13058_2018_978_MOESM8_ESM.pdf]
