# Supplementary material for: Identification and validation of single-sample breast cancer radiosensitivity gene expression predictors
Source: Springer Nature journal article supplement (doi:10.1186/s13058-018-0978-y), 2018-07-04

# Supplemental figure 3

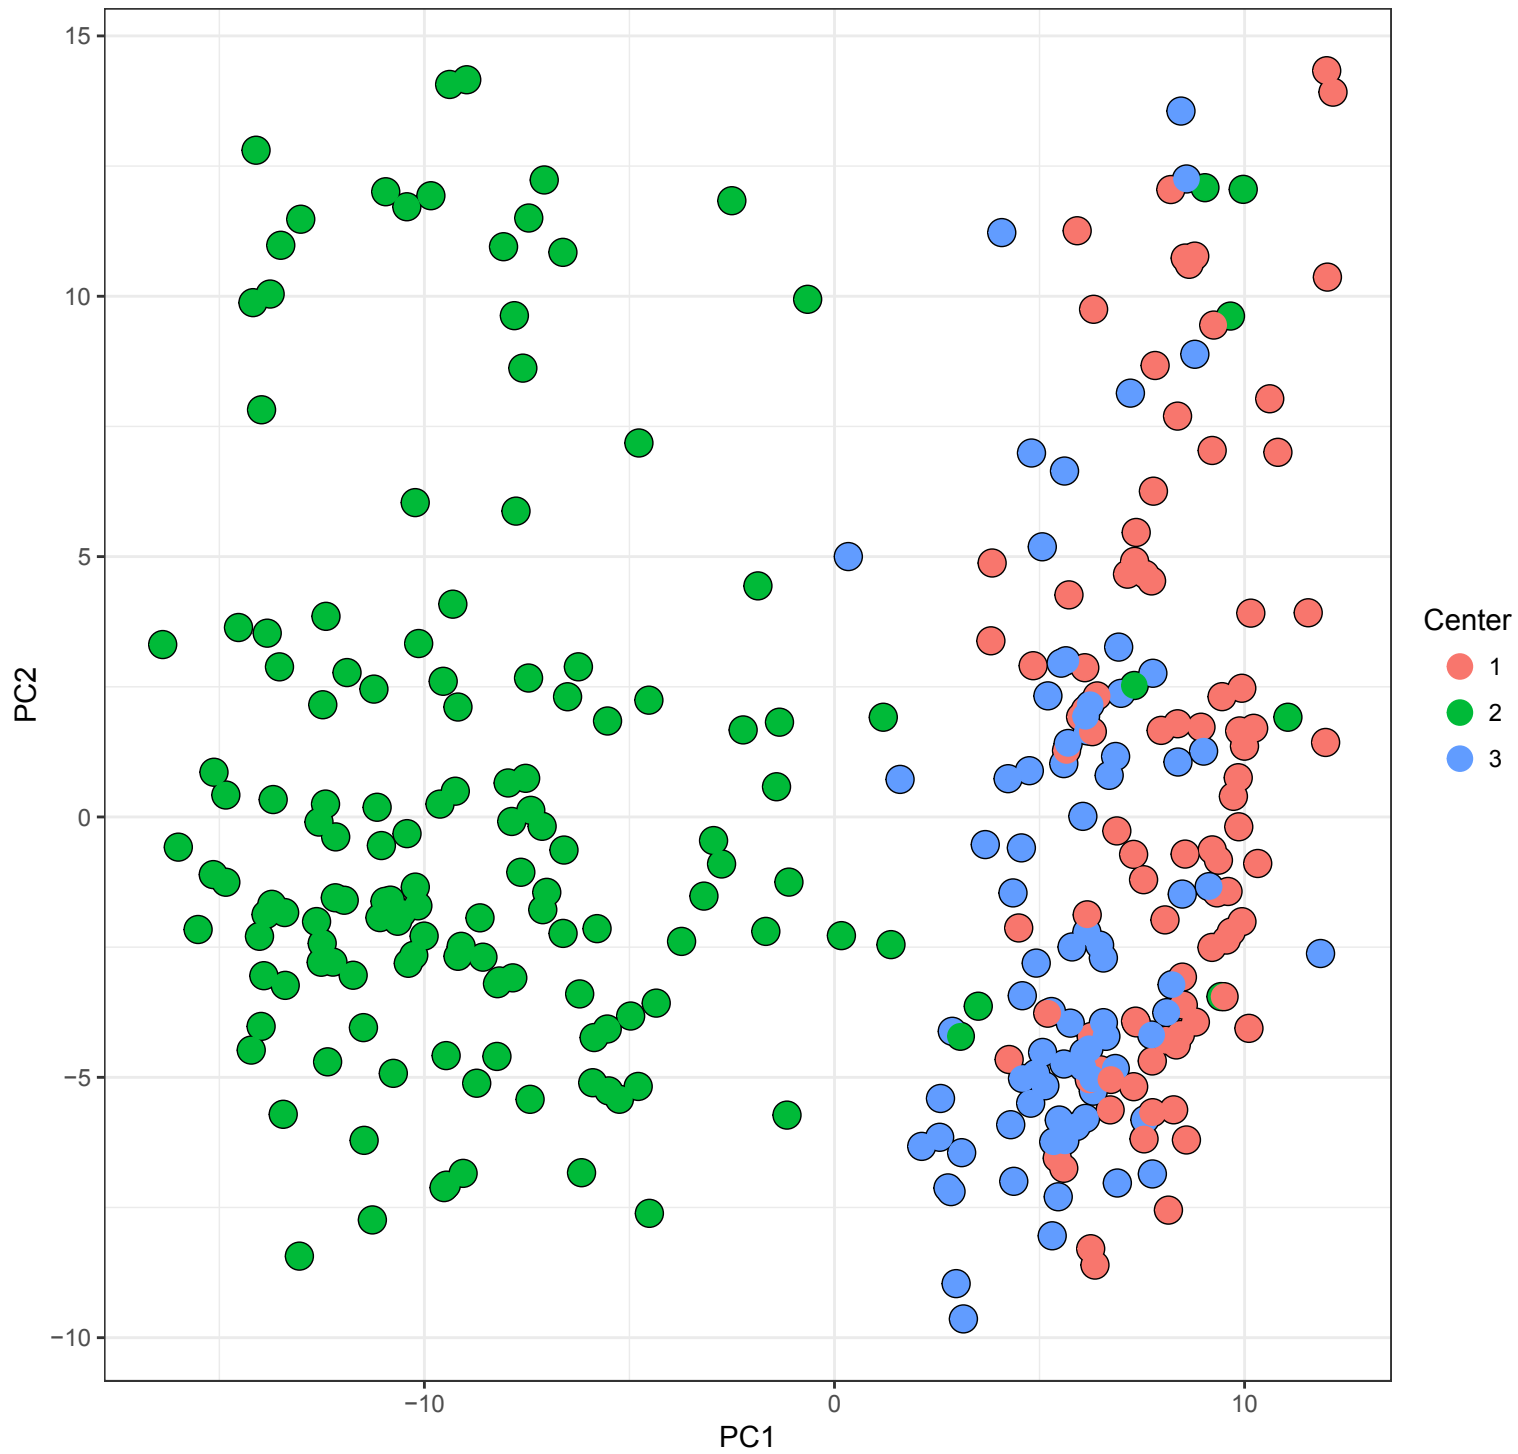

Supplement: MOESM1 [file 15908318]
